# Supplementary material
Source: PubMed Central journal article supplement (PMC4339532)
Supplement: NIHMS640388-supplement.pdf [file NIHMS640388-supplement.pdf]

**Appendix Table 1.** Association between night shift work and cancer-specific (with  $\geq 100$ ,  $< 200$  cases) mortality in NHS (n=74,862).

|                                        | Night shift work duration |                   |                   |                   | p for trend  |
|----------------------------------------|---------------------------|-------------------|-------------------|-------------------|--------------|
|                                        | Never                     | 1-5 years         | 6-14 years        | $\geq 15$ years   |              |
| <b>Brain cancer</b>                    |                           |                   |                   |                   |              |
| No. of deaths                          | 62                        | 75                | 17                | 10                |              |
| Age-adjusted HR (95% CI)               | 1.00 (ref)                | 1.19 (0.85, 1.67) | 0.98 (0.57, 1.68) | 0.87 (0.44, 1.70) | 0.60         |
| Multivariable HR (95% CI) <sup>a</sup> | 1.00 (ref)                | 1.19 (0.85, 1.68) | 0.91 (0.53, 1.57) | 0.77 (0.39, 1.51) | 0.34         |
| <b>Kidney cancer</b>                   |                           |                   |                   |                   |              |
| No. of deaths                          | 43                        | 34                | 21                | 13                |              |
| Age-adjusted HR (95% CI)               | 1.00 (ref)                | 0.78 (0.50, 1.23) | 1.60 (0.94, 2.73) | 1.48 (0.79, 2.77) | <b>0.04</b>  |
| Multivariable HR (95% CI) <sup>a</sup> | 1.00 (ref)                | 0.79 (0.51, 1.23) | 1.72 (1.03, 2.86) | 1.39 (0.75, 2.57) | <b>0.048</b> |
| <b>Uterus cancer</b>                   |                           |                   |                   |                   |              |
| No. of deaths                          | 54                        | 63                | 20                | 13                |              |
| Age-adjusted model                     | 1.00 (ref)                | 1.16 (0.80, 1.67) | 1.33 (0.80, 2.23) | 1.25 (0.68, 2.29) | 0.35         |
| Multivariable HR (95% CI) <sup>a</sup> | 1.00 (ref)                | 1.19 (0.84, 1.72) | 1.19 (0.70, 2.00) | 1.04 (0.57, 1.92) | 0.85         |
| <b>Myeloma</b>                         |                           |                   |                   |                   |              |
| No. of deaths                          | 44                        | 57                | 21                | 13                |              |
| Age-adjusted HR (95% CI)               | 1.00 (ref)                | 1.25 (0.84, 1.85) | 1.60 (0.95, 2.70) | 1.44 (0.77, 2.68) | 0.13         |
| Multivariable HR (95% CI) <sup>a</sup> | 1.00 (ref)                | 1.35 (0.91, 1.98) | 1.56 (0.93, 2.64) | 1.61 (0.90, 2.88) | 0.08         |
| <b>Leukemia</b>                        |                           |                   |                   |                   |              |
| No. of deaths                          | 43                        | 43                | 16                | 14                |              |
| Age-adjusted HR (95% CI)               | 1.00 (ref)                | 0.97 (0.63, 1.48) | 1.24 (0.70, 2.21) | 1.52 (0.83, 2.78) | 0.12         |
| Multivariable HR (95% CI) <sup>a</sup> | 1.00 (ref)                | 0.91 (0.64, 1.31) | 1.17 (0.72, 1.89) | 1.22 (0.71, 2.09) | 0.33         |

Boldface indicates statistical significance ( $p < 0.05$ ).

NHS, Nurses' Health Study cohort; HR: hazard ratio

<sup>a</sup>Multivariate model adjusted for age (continuous), alcohol consumption (none, 0.1-4.9, 5.0-14.9,  $\geq 15.0$  g/d), physical exercise (metabolic equivalent values; quintiles), multivitamin use (yes, no), menopausal status (premenopausal, postmenopausal) and postmenopausal hormone use (never, past and current), physical exam in the past 2 years (no, yes for symptoms and yes for screenings), healthy eating score (quintiles), smoking status (never, former, current), pack-years ( $< 10$ , 10-19, 20-39,  $\geq 40$  for former smokers;  $< 25$ , 25-44, 45-64,  $\geq 65$  for current smokers), and BMI ( $\text{kg}/\text{m}^2$ ;  $< 21$ , 21-22.9, 23-24.9, 25-27.4, 27.5-29.9, 30-34.9,  $\geq 35$ ) and husband's education (less than high school, some high school, high school graduate, college, graduate school, missingness).

**Appendix Table 2.** Association between night shift work and selected mortality endpoints stratified by body mass index.

|                                    |             | Night shift work duration |                   |                   |                   | p for trend  | p-interaction |
|------------------------------------|-------------|---------------------------|-------------------|-------------------|-------------------|--------------|---------------|
|                                    |             | Never                     | 1-5 years         | 6-14 years        | ≥15 years         |              |               |
| <b>All cause</b>                   |             |                           |                   |                   |                   |              |               |
| Normal weight                      | Deaths      | 2,973                     | 3,082             | 951               | 691               | <b>0.005</b> | 0.57          |
|                                    | HR (95% CI) | 1.00 (ref)                | 1.04 (0.99, 1.09) | 1.10 (1.02, 1.18) | 1.11 (1.02, 1.20) |              |               |
| Overweight                         | Deaths      | 1,485                     | 1,426             | 549               | 393               | <b>0.03</b>  |               |
|                                    | HR (95% CI) | 1.00 (ref)                | 0.97 (0.90, 1.04) | 1.12 (1.01, 1.23) | 1.08 (0.96, 1.20) |              |               |
| Obesity                            | Deaths      | 990                       | 953               | 406               | 362               | 0.22         |               |
|                                    | HR (95% CI) | 1.00 (ref)                | 0.96 (0.88, 1.05) | 1.02 (0.91, 1.14) | 1.06 (0.94, 1.20) |              |               |
| <b>All cardiovascular diseases</b> |             |                           |                   |                   |                   |              |               |
| Normal weight                      | Deaths      | 501                       | 508               | 169               | 146               | <b>0.02</b>  | 0.77          |
|                                    | HR (95% CI) | 1.00 (ref)                | 1.01 (0.89, 1.15) | 1.10 (0.92, 1.31) | 1.24 (1.03, 1.49) |              |               |
| Overweight                         | Deaths      | 285                       | 281               | 117               | 82                | 0.39         |               |
|                                    | HR (95% CI) | 1.00 (ref)                | 0.99 (0.84, 1.17) | 1.17 (0.94, 1.46) | 1.04 (0.81, 1.34) |              |               |
| Obesity                            | Deaths      | 217                       | 228               | 114               | 94                | 0.14         |               |
|                                    | HR (95% CI) | 1.00 (ref)                | 1.08 (0.90, 1.30) | 1.29 (1.03, 1.62) | 1.14 (0.89, 1.46) |              |               |
| <b>All cancer</b>                  |             |                           |                   |                   |                   |              |               |
| Normal weight                      | Deaths      | 1,043                     | 1,084             | 320               | 215               | 0.23         | 0.31          |
|                                    | HR (95% CI) | 1.00 (ref)                | 1.04 (0.96, 1.14) | 1.09 (0.96, 1.24) | 1.07 (0.92, 1.24) |              |               |
| Overweight                         | Deaths      | 573                       | 587               | 200               | 146               | 0.21         |               |
|                                    | HR (95% CI) | 1.00 (ref)                | 1.03 (0.92, 1.15) | 1.08 (0.92, 1.27) | 1.11 (0.92, 1.33) |              |               |
| Obesity                            | Deaths      | 358                       | 349               | 111               | 118               | 0.66         |               |
|                                    | HR (95% CI) | 1.00 (ref)                | 0.97 (0.83, 1.12) | 0.79 (0.64, 0.98) | 1.02 (0.83, 1.26) |              |               |
| <b>Lung Cancer</b>                 |             |                           |                   |                   |                   |              |               |
| Normal weight                      | Deaths      | 283                       | 278               | 91                | 72                | 0.25         | 0.94          |
|                                    | HR (95% CI) | 1.00 (ref)                | 0.99 (0.84, 1.18) | 1.00 (0.79, 1.28) | 1.19 (0.91, 1.55) |              |               |
| Overweight                         | Deaths      | 124                       | 139               | 42                | 45                | 0.13         |               |
|                                    | HR (95% CI) | 1.00 (ref)                | 1.10 (0.86, 1.42) | 0.99 (0.69, 1.42) | 1.41 (0.98, 2.02) |              |               |

|                          |             |            |                   |                   |                   |             |      |
|--------------------------|-------------|------------|-------------------|-------------------|-------------------|-------------|------|
| Obesity                  | Deaths      | 60         | 64                | 23                | 27                |             |      |
|                          | HR (95% CI) | 1.00 (ref) | 1.03 (0.70, 1.52) | 0.83 (0.49, 1.39) | 1.33 (0.80, 2.21) |             | 0.45 |
| <b>Colorectal cancer</b> |             |            |                   |                   |                   |             |      |
| Normal weight            | Deaths      | 96         | 83                | 29                | 27                |             | 0.33 |
|                          | HR (95% CI) | 1.00 (ref) | 0.87 (0.65, 1.18) | 1.12 (0.73, 1.71) | 1.66 (1.06, 2.58) | <b>0.02</b> |      |
| Overweight               | Deaths      | 51         | 47                | 17                | 12                |             |      |
|                          | HR (95% CI) | 1.00 (ref) | 0.90 (0.60, 1.36) | 1.05 (0.60, 1.84) | 1.11 (0.58, 2.14) |             | 0.66 |
| Obesity                  | Deaths      | 26         | 38                | 8                 | 12                |             |      |
|                          | HR (95% CI) | 1.00 (ref) | 1.43 (0.86, 2.40) | 0.83 (0.36, 1.89) | 1.37 (0.66, 2.83) |             | 0.78 |

Boldface indicates statistical significance ( $p < 0.05$ ).

HR, hazard ratio; CI, confidence interval.

*Note:* Cox proportional hazard model adjusted for age (continuous), alcohol consumption (none, 0.1-4.9, 5.0-14.9,  $\geq 15.0$  g/d), physical exercise (metabolic equivalent values; quintiles), multivitamin use (yes, no), hypertension (yes, no), hypercholesterolemia (yes, no), type 2 diabetes (yes, no), menopausal status (premenopausal, postmenopausal) and postmenopausal hormone use (never, past and current), physical exam in the past 2 years (no, yes for symptoms and yes for screenings), healthy eating score (quintiles), smoking status (never, former, current), pack-years ( $< 10$ , 10-19, 20-39,  $\geq 40$  for former smokers;  $< 25$ , 25-44, 45-64,  $\geq 65$  for current smokers), and BMI ( $\text{kg}/\text{m}^2$ ;  $< 21$ , 21-22.9, 23-24.9, 25-27.4, 27.5-29.9, 30-34.9,  $\geq 35$ ) and husband's education (less than high school, some high school, high school graduate, college, graduate school). p-values for interaction were obtained by adding interaction terms into the models and performing likelihood ratio tests.
